# Supplementary figures and images for: Genome-scale evidence of the nematode-arthropod clade
Source: Springer Nature journal article supplement (doi:10.1186/gb-2005-6-5-r41), 2005-04-28

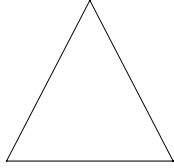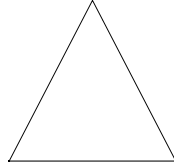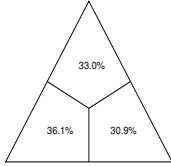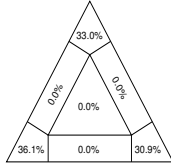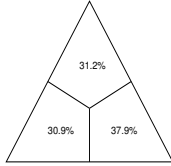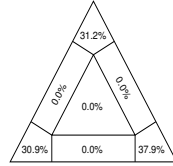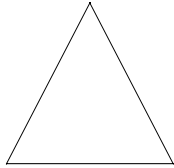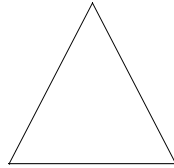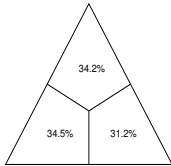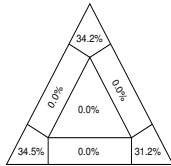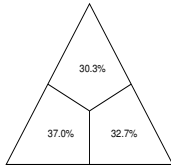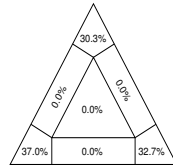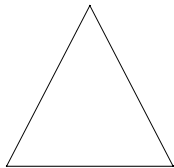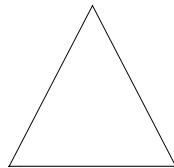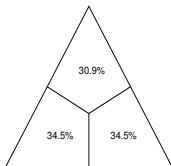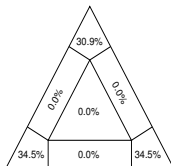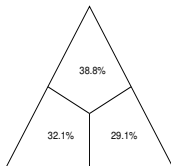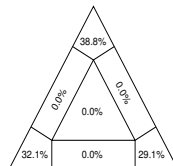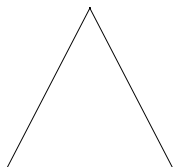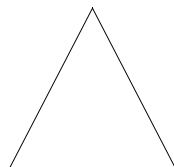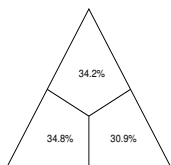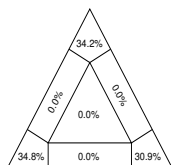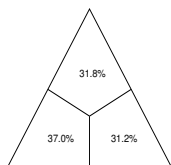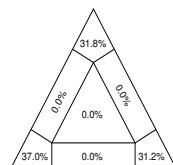

Supplement: Additional file 1 [file gb-2005-6-5-r41-s1.pdf]
